# Supplementary material for: DNA-Based Faecal Dietary Analysis: A Comparison of qPCR and High Throughput Sequencing Approaches
Source: PLoS One. 2011 Oct 6;6(10):e25776. doi: 10.1371/journal.pone.0025776 (PMC3188572; doi:10.1371/journal.pone.0025776)
Supplement: Table S1 — Percentage contribution of prey items detected by HTS for each faecal sample. The percentage contribution of detected prey items within each individual faecal sample, as determined by HTS of samples collected during the period of Oct ‘10-Dec ’10, using 16SF1/16S2R universal primers. (XLS) [file pone.0025776.s001.xls]

## Sheet: Sheet1
aDNA extraction no.	Total reads	En	Sr	Sa	Hv	Pm	Pw	Sb	Em	Td	Et	Sl	Pel
PEN_01	176			100												Scientific name	Common Name
PEN_04	64	9.375		90.625											Species:	Engraulis australis (En)	Anchovy
PEN_05	811	90.5055		8.26141		1.23305										Spratelloides robustus (Sr)	Blue Sprat
PEN_08	114			100												Sardinops sagax (Sa)	Sandy Sprat
PEN_11	139	4.31655			95.6835											Hyperlophus vittatus (Hv)	Pilchard
PEN_12	96	34.375			65.625											Parequula melbournensis (Pm)	Silverbelly
PEN_14	145			97.2414	2.75862											Pseudocaranx wrighti (Pw)	Shipjack Trevally
PEN_15	35				100											Sillago bassensis (Sb)	Southern School Whiting
PEN_16	675		4.14815		86.5185		9.33333									Eubalichthys mosaicus (Em)	Mosaic Leatherjacket
PEN_17	101			100												Trachurus declivis (Td)	Common Jack Mackeral
PEN_18	208	37.5	30.7692	12.5	16.8269		2.40385									Etrumeus teres (Et)	Round Herring
PEN_19	187				100											Sardinella lemuru (Sl)	Scaly Mackeral
PEN_20	268			7.83582	92.1642										Genus:	Pelates octolineatus (Pel)	Western Striped Grunter
PEN_21	62	3.22581			95.1613						1.6129
PEN_22	357				100
PEN_23	119				100
PEN_24	133			100
PEN_28	230			84.3478	14.7826				0.869565
PEN_32	208	0.480769		29.8077	69.7115
PEN_35	136				100
PEN_38	0
PEN_39	113	1.76991	93.8053			0.884956					3.53982
PEN_41	962	24.4283	0.10395	74.948						0.519751
PEN_42	84				45.2381	47.619		1.19048					5.95238
PEN_50	630	66.9841		30.7937	1.26984							0.952381
PEN_51	162				100
PEN_40B	1055	0.28436			99.7156
	Sum of %'s	273.245	128.827	836.361	1285.46	49.737	11.7372	1.19048	0.869565	0.519751	5.15273	0.952381	5.95238
	Overall % contribution	10.5094	4.95487	32.1677	49.4406	1.91296	0.45143	0.0457875	0.0334448	0.0199904	0.198182	0.03663	0.228938
Table S1: Percentage contribution of prey items detected by HTS for each faecal sample.
The percentage contribution of detected prey items within each individual faecal sample, as determined by HTS of samples collected during the period of Oct ’10-Dec ’10, using 16SF1/16S2R universal primers.
